# Supplementary material for: Circulating ACE2-expressing extracellular vesicles block broad strains of SARS-CoV-2
Source: PubMed Central journal article supplement (PMC8776790; doi:10.1038/s41467-021-27893-2), 2022-01-20
Supplement: 41467_2021_27893_MOESM3_ESM.pdf [file 41467_2021_27893_MOESM3_ESM.pdf]

### **Description of Additional Supplementary Files**

File Name: Supplementary Data 1

Description: Mass spectrometry data of the peptides pulled down by RBD-beads
